# Supplementary material
Source: PubMed Central journal article supplement (PMC5672807)

Figure S1

A. BrdU+ cells in CRPtg/Smad3KO AKI mice

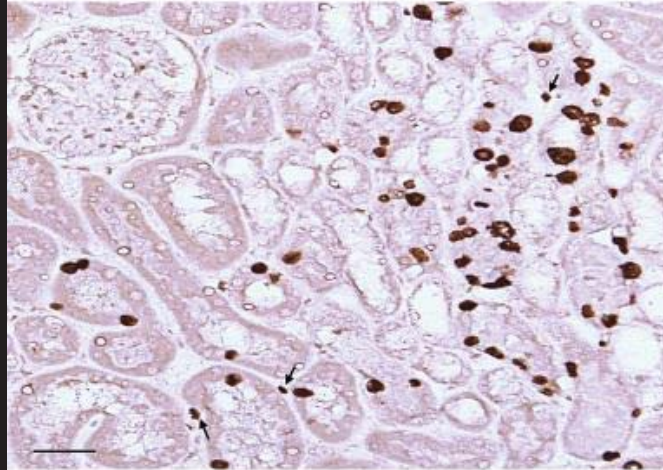

B. PCNA+ cells in CRPtg/Smad3KO AKI mice

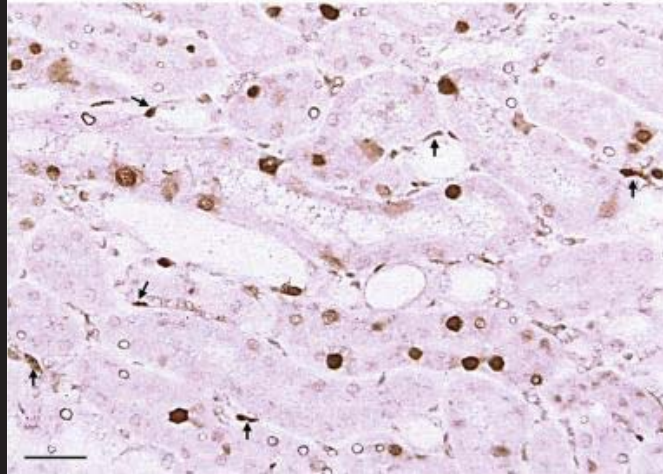

Supplement: NIHMS916008-supplement-Figure_S1.pdf [file NIHMS916008-supplement-Figure_S1.pdf]

Figure S2

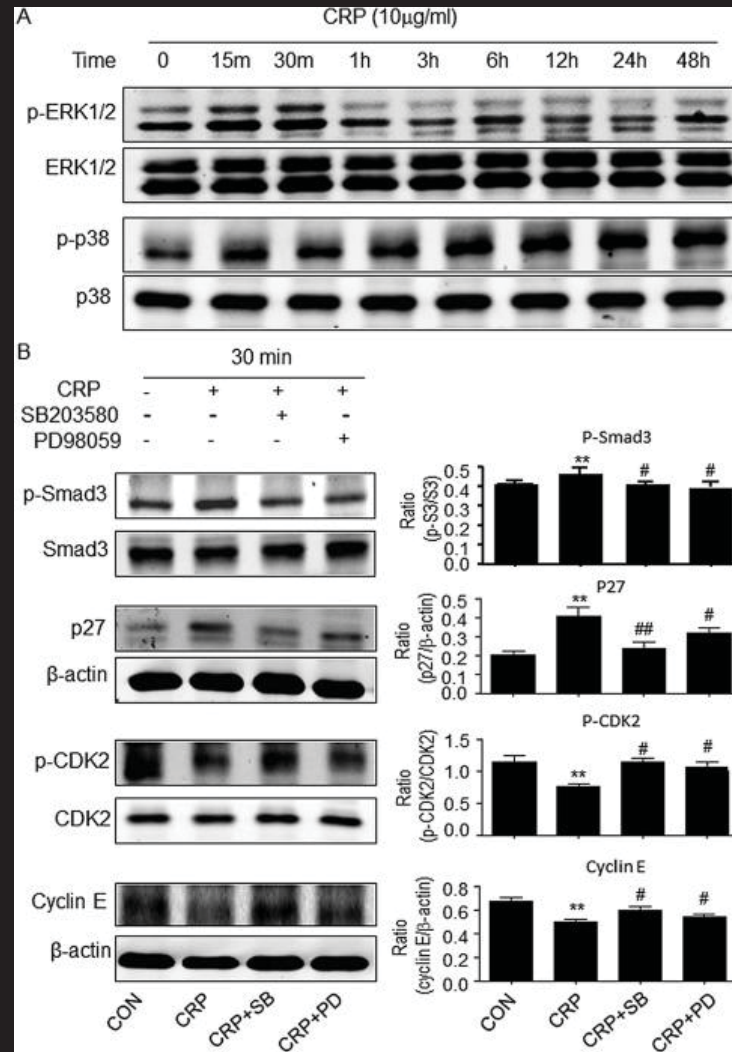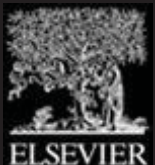

Supplement: NIHMS916008-supplement-Figure_S2.pdf [file NIHMS916008-supplement-Figure_S2.pdf]

Figure S3

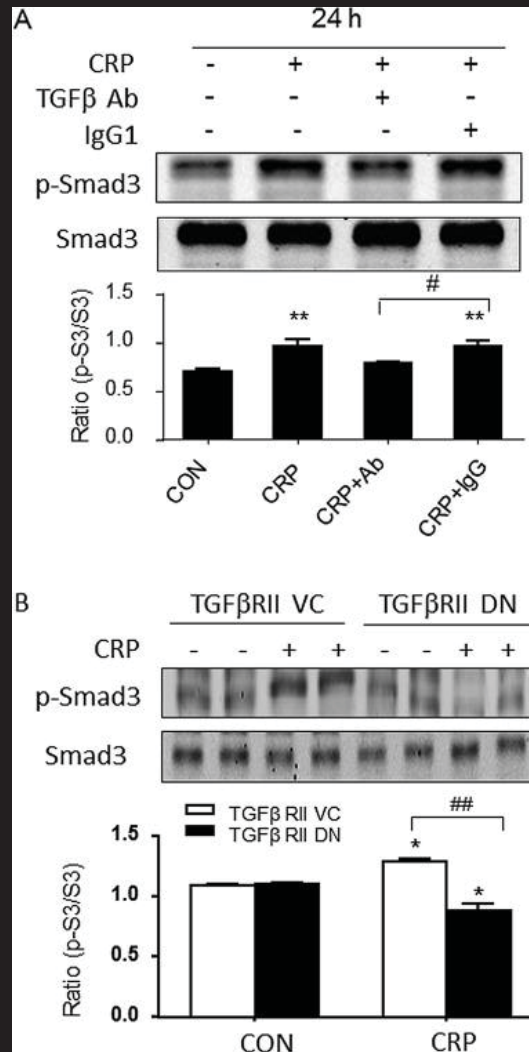

Supplement: NIHMS916008-supplement-Figure_S3.pdf [file NIHMS916008-supplement-Figure_S3.pdf]

Figure S4

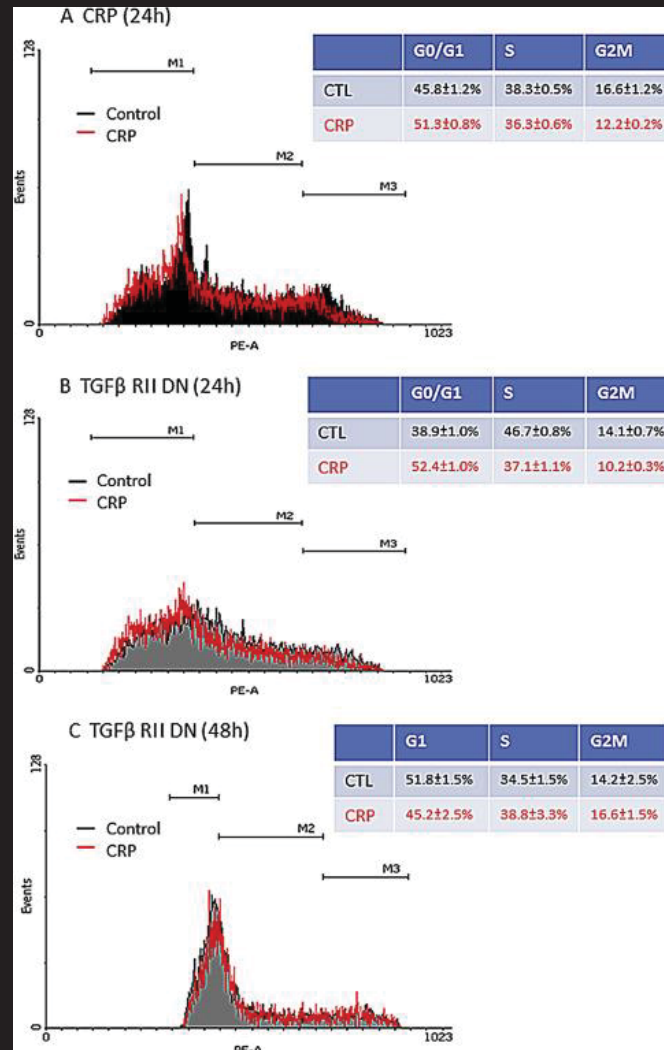

Supplement: NIHMS916008-supplement-Figure_S4.pdf [file NIHMS916008-supplement-Figure_S4.pdf]

Figure S5

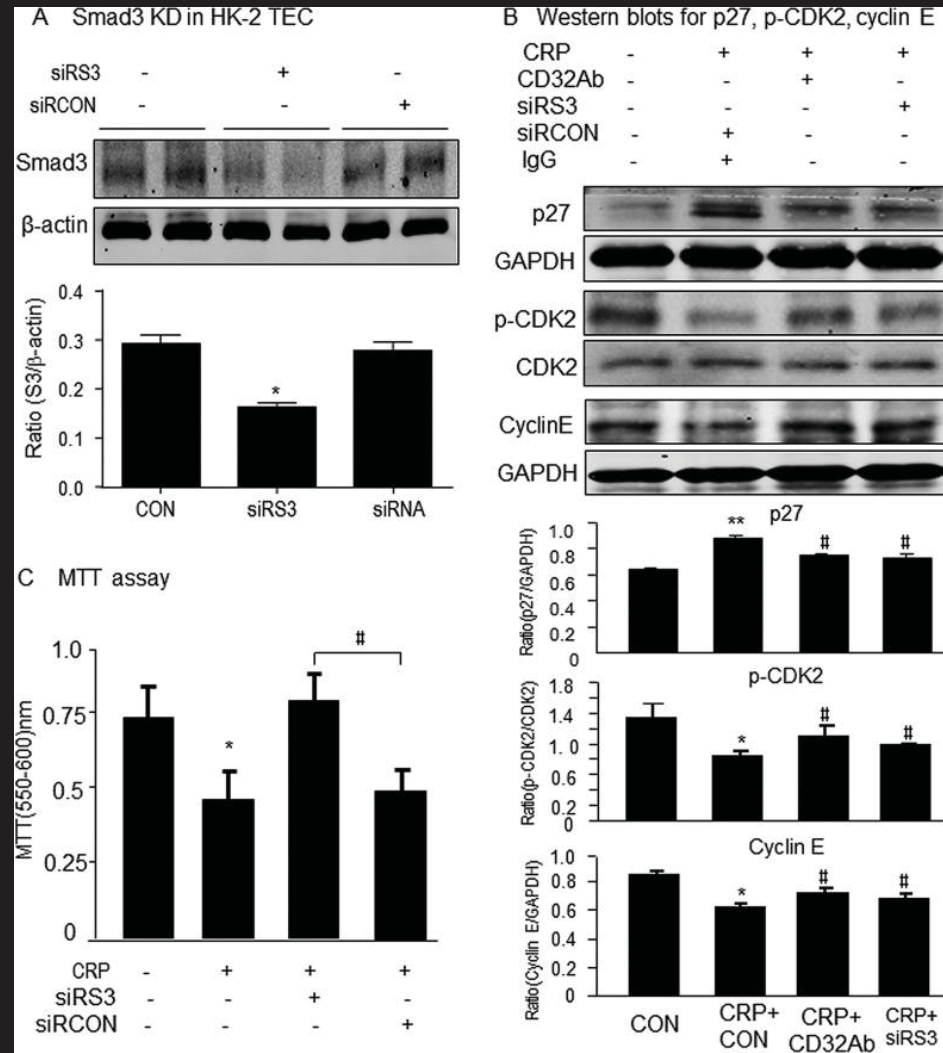

Supplement: NIHMS916008-supplement-Figure_S5.pdf [file NIHMS916008-supplement-Figure_S5.pdf]
